# Supplementary material for: The HUSH complex cooperates with TRIM28 to repress young retrotransposons and new genes
Source: Genome Res. 2018 Jun;28(6):836–45. doi: 10.1101/gr.228171.117 (PMC5991525; doi:10.1101/gr.228171.117)
Supplement: Supplemental Material [file supp_gr.228171.117_Supplemental_Table_S6.xlsx]

## Sheet: TRIM28-FAM208A_corepressed
Gene ID	Description	Chromosome/scaffold name	Gene Start (bp)	Gene End (bp)	Associated Gene Name	Gene type
ENSMUSG00000062496	RIKEN cDNA 4930431F12 gene [Source:MGI Symbol;Acc:MGI:1923033]	5	44966200	44978805	4930431F12Rik	lincRNA
ENSMUSG00000074804	expressed sequence AU015228 [Source:MGI Symbol;Acc:MGI:2139152]	2	130100524	130101843	AU015228	processed_pseudogene
ENSMUSG00000084034	predicted gene 12617 [Source:MGI Symbol;Acc:MGI:3649880]	11	60692695	60693075	Gm12617	processed_pseudogene
ENSMUSG00000094566	predicted gene 12620 [Source:MGI Symbol;Acc:MGI:3649879]	11	60682179	60684164	Gm12620	processed_pseudogene
ENSMUSG00000093924	predicted gene 12623 [Source:MGI Symbol;Acc:MGI:3650566]	11	60573567	60575549	Gm12623	processed_pseudogene
ENSMUSG00000081465	predicted gene 12884 [Source:MGI Symbol;Acc:MGI:3651895]	4	121381429	121381753	Gm12884	processed_pseudogene
ENSMUSG00000082195	predicted gene 13034 [Source:MGI Symbol;Acc:MGI:3650252]	4	146067752	146070928	Gm13034	processed_pseudogene
ENSMUSG00000082925	predicted gene 13135 [Source:MGI Symbol;Acc:MGI:3650404]	4	147275976	147279096	Gm13135	processed_pseudogene
ENSMUSG00000095265	predicted pseudogene 16368 [Source:MGI Symbol;Acc:MGI:3647101]	12	88083697	88084131	Gm16368	processed_pseudogene
ENSMUSG00000098010	predicted gene, 21542 [Source:MGI Symbol;Acc:MGI:5434897]	19	23666591	23667583	Gm21542	processed_pseudogene
ENSMUSG00000095836	predicted gene, 21960 [Source:MGI Symbol;Acc:MGI:5439429]	3	96412910	96413361	Gm21960	processed_pseudogene
ENSMUSG00000102746	predicted gene, 37601 [Source:MGI Symbol;Acc:MGI:5610829]	3	67684359	67684752	Gm37601	processed_pseudogene
ENSMUSG00000107418	predicted gene 4782 [Source:MGI Symbol;Acc:MGI:3646036]	6	50608637	50610682	Gm4782	processed_pseudogene
ENSMUSG00000083258	predicted pseudogene 5939 [Source:MGI Symbol;Acc:MGI:3648845]	X	78855408	78858281	Gm5939	processed_pseudogene
ENSMUSG00000107821	predicted gene 8038 [Source:MGI Symbol;Acc:MGI:3644148]	6	50619841	50621884	Gm8038	processed_pseudogene
ENSMUSG00000020299	RIKEN cDNA 4930524B15 gene [Source:MGI Symbol;Acc:MGI:1914842]	11	31965592	31979651	4930524B15Rik	protein_coding (unknown function)
ENSMUSG00000079324	RIKEN cDNA 4932414N04 gene [Source:MGI Symbol;Acc:MGI:1922971]	2	68656486	68748467	4932414N04Rik	protein_coding (unknown function)
ENSMUSG00000094383		JH584299.1	90482	93220	AC123873.1	protein_coding (unknown function)
ENSMUSG00000024803	ankyrin repeat domain 1 (cardiac muscle) [Source:MGI Symbol;Acc:MGI:1097717]	19	36111965	36119844	Ankrd1	protein_coding
ENSMUSG00000058589	ankyrin repeat and sterile alpha motif domain containing 1B [Source:MGI Symbol;Acc:MGI:1924781]	10	89873509	90973300	Anks1b	protein_coding
ENSMUSG00000021950	annexin A8 [Source:MGI Symbol;Acc:MGI:1201374]	14	34085981	34100571	Anxa8	protein_coding
ENSMUSG00000022229	ATPase, H+/K+ transporting, nongastric, alpha polypeptide [Source:MGI Symbol;Acc:MGI:1926943]	14	56365068	56388551	Atp12a	protein_coding
ENSMUSG00000079031	expressed sequence BB287469 [Source:MGI Symbol;Acc:MGI:3034635]	12	87816577	87820676	BB287469	protein_coding
ENSMUSG00000029279	bromodomain, testis-specific [Source:MGI Symbol;Acc:MGI:1891374]	5	107331159	107387058	Brdt	protein_coding
ENSMUSG00000025983	coiled-coil domain containing 150 [Source:MGI Symbol;Acc:MGI:1925266]	1	54250683	54368727	Ccdc150	protein_coding
ENSMUSG00000090176	Cd200 receptor 2 [Source:MGI Symbol;Acc:MGI:3042847]	16	44867097	44915840	Cd200r2	protein_coding
ENSMUSG00000037664	cyclin-dependent kinase inhibitor 1C (P57) [Source:MGI Symbol;Acc:MGI:104564]	7	143458339	143461050	Cdkn1c	protein_coding
ENSMUSG00000022150	disabled 2, mitogen-responsive phosphoprotein [Source:MGI Symbol;Acc:MGI:109175]	15	6299788	6440712	Dab2	protein_coding
ENSMUSG00000046818	DNA-damage-inducible transcript 4-like [Source:MGI Symbol;Acc:MGI:1920534]	3	137621612	137628333	Ddit4l	protein_coding
ENSMUSG00000074442	defensin, alpha, 31 [Source:MGI Symbol;Acc:MGI:102509]	8	21191614	21192549	Defa31	protein_coding
ENSMUSG00000019278	dipeptidase 1 (renal) [Source:MGI Symbol;Acc:MGI:94917]	8	123186242	123201812	Dpep1	protein_coding
ENSMUSG00000037887	dual specificity phosphatase 8 [Source:MGI Symbol;Acc:MGI:106626]	7	142079490	142095843	Dusp8	protein_coding
ENSMUSG00000020690	EF-hand calcium binding domain 3 [Source:MGI Symbol;Acc:MGI:1918144]	11	105063592	105117537	Efcab3	protein_coding
ENSMUSG00000048915	ephrin A5 [Source:MGI Symbol;Acc:MGI:107444]	17	62604184	62881317	Efna5	protein_coding
ENSMUSG00000001300	ephrin B2 [Source:MGI Symbol;Acc:MGI:105097]	8	8617434	8661242	Efnb2	protein_coding
ENSMUSG00000048458	family with sequence similarity 212, member B [Source:MGI Symbol;Acc:MGI:1923497]	3	105704599	105720842	Fam212b	protein_coding
ENSMUSG00000024778	Fas (TNF receptor superfamily member 6) [Source:MGI Symbol;Acc:MGI:95484]	19	34290659	34327770	Fas	protein_coding
ENSMUSG00000005836	GATA binding protein 6 [Source:MGI Symbol;Acc:MGI:107516]	18	11052510	11085635	Gata6	protein_coding
ENSMUSG00000029298	guanylate-binding protein 9 [Source:MGI Symbol;Acc:MGI:3605620]	5	105077630	105139539	Gbp9	protein_coding
ENSMUSG00000096201	predicted gene 10715 [Source:MGI Symbol;Acc:MGI:3642376]	9	3036877	3038316	Gm10715	predicted protein-coding
ENSMUSG00000095891	predicted gene 10717 [Source:MGI Symbol;Acc:MGI:3642031]	9	3025417	3033289	Gm10717	predicted protein-coding
ENSMUSG00000095186	predicted gene 10718 [Source:MGI Symbol;Acc:MGI:3642028]	9	3023547	3025218	Gm10718	predicted protein-coding
ENSMUSG00000095547	predicted gene 10719 [Source:MGI Symbol;Acc:MGI:3641690]	9	3017408	3021593	Gm10719	predicted protein-coding
ENSMUSG00000074564	predicted gene 10720 [Source:MGI Symbol;Acc:MGI:3641687]	9	3015654	3017210	Gm10720	predicted protein-coding
ENSMUSG00000096519	predicted gene 10721 [Source:MGI Symbol;Acc:MGI:3641688]	9	3013140	3014344	Gm10721	predicted protein-coding
ENSMUSG00000075014	predicted gene 10800 [Source:MGI Symbol;Acc:MGI:3641657]	2	98666547	98667301	Gm10800	predicted protein-coding
ENSMUSG00000075015	predicted gene 10801 [Source:MGI Symbol;Acc:MGI:3641656]	2	98662237	98664083	Gm10801	predicted protein-coding
ENSMUSG00000096385	predicted gene 11168 [Source:MGI Symbol;Acc:MGI:3779420]	9	3003346	3006948	Gm11168	predicted protein-coding
ENSMUSG00000067285	predicted gene 16223 [Source:MGI Symbol;Acc:MGI:3648966]	5	42067960	42216798	Gm16223	predicted protein-coding
ENSMUSG00000090286	predicted gene, 17615 [Source:MGI Symbol;Acc:MGI:4937249]	14	124005355	124007629	Gm17615	predicted protein-coding
ENSMUSG00000095280	predicted gene, 21738 [Source:MGI Symbol;Acc:MGI:5433902]	14	19415857	19418930	Gm21738	predicted protein-coding
ENSMUSG00000094030	predicted gene, 21833 [Source:MGI Symbol;Acc:MGI:5433997]	16	82828382	82829881	Gm21833	predicted protein-coding
ENSMUSG00000079374	predicted gene 8334 [Source:MGI Symbol;Acc:MGI:3648921]	X	148613253	148615153	Gm8334	predicted protein-coding
ENSMUSG00000016283	histocompatibility 2, M region locus 2 [Source:MGI Symbol;Acc:MGI:95914]	17	37480851	37483552	H2-M2	protein_coding
ENSMUSG00000036181	histone cluster 1, H1c [Source:MGI Symbol;Acc:MGI:1931526]	13	23738808	23740367	Hist1h1c	protein_coding
ENSMUSG00000091971	heat shock protein 1A [Source:MGI Symbol;Acc:MGI:96244]	17	34969190	34972156	Hspa1a	protein_coding
ENSMUSG00000024810	interleukin 33 [Source:MGI Symbol;Acc:MGI:1924375]	19	29925114	29960718	Il33	protein_coding
ENSMUSG00000038209	intelectin 1 (galactofuranose binding) [Source:MGI Symbol;Acc:MGI:1333831]	1	171518122	171535294	Itln1	protein_coding
ENSMUSG00000037653	potassium channel tetramerisation domain containing 8 [Source:MGI Symbol;Acc:MGI:2443804]	5	69109285	69341679	Kctd8	protein_coding
ENSMUSG00000071335	major facilitator superfamily domain containing 4B3 [Source:MGI Symbol;Acc:MGI:3773841]	10	39946907	39960153	Mfsd4b3	protein_coding
ENSMUSG00000026712	mannose receptor, C type 1 [Source:MGI Symbol;Acc:MGI:97142]	2	14229392	14332057	Mrc1	protein_coding
ENSMUSG00000058669	NK2 homeobox 9 [Source:MGI Symbol;Acc:MGI:1270158]	12	56611389	56613284	Nkx2-9	protein_coding
ENSMUSG00000062991	neuregulin 1 [Source:MGI Symbol;Acc:MGI:96083]	8	31814551	32884029	Nrg1	protein_coding
ENSMUSG00000028023	paired-like homeodomain transcription factor 2 [Source:MGI Symbol;Acc:MGI:109340]	3	129199878	129219591	Pitx2	protein_coding
ENSMUSG00000021701	polo-like kinase 2 [Source:MGI Symbol;Acc:MGI:1099790]	13	110395044	110400844	Plk2	protein_coding
ENSMUSG00000031775	plasma membrane proteolipid [Source:MGI Symbol;Acc:MGI:1915051]	8	94674894	94696278	Pllp	protein_coding
ENSMUSG00000019944	Rho-related BTB domain containing 1 [Source:MGI Symbol;Acc:MGI:1916538]	10	69151434	69291791	Rhobtb1	protein_coding
ENSMUSG00000032125	roundabout guidance receptor 4 [Source:MGI Symbol;Acc:MGI:1921394]	9	37401897	37415115	Robo4	protein_coding
ENSMUSG00000079012	serine (or cysteine) peptidase inhibitor, clade A, member 3M [Source:MGI Symbol;Acc:MGI:98378]	12	104338486	104394257	Serpina3m	protein_coding
ENSMUSG00000037990	SH3 domain containing ring finger 3 [Source:MGI Symbol;Acc:MGI:2444637]	10	58813359	59138916	Sh3rf3	protein_coding
ENSMUSG00000040322	solute carrier family 25 (mitochondrial carrier, phosphate carrier), member 24 [Source:MGI Symbol;Acc:MGI:1917160]	3	109123149	109168457	Slc25a24	protein_coding
ENSMUSG00000024921	SWI/SNF related, matrix associated, actin dependent regulator of chromatin, subfamily a, member 2 [Source:MGI Symbol;Acc:MGI:99603]	19	26605050	26778322	Smarca2	protein_coding
ENSMUSG00000051910	SRY (sex determining region Y)-box 6 [Source:MGI Symbol;Acc:MGI:98368]	7	115470872	116038796	Sox6	protein_coding
ENSMUSG00000037321	transporter 1, ATP-binding cassette, sub-family B (MDR/TAP) [Source:MGI Symbol;Acc:MGI:98483]	17	34187553	34197225	Tap1	protein_coding
ENSMUSG00000040413	T cell immunoglobulin and mucin domain containing 2 [Source:MGI Symbol;Acc:MGI:2159681]	11	46668960	46707061	Timd2	protein_coding
ENSMUSG00000017607	tensin 4 [Source:MGI Symbol;Acc:MGI:2144377]	11	99065678	99089306	Tns4	protein_coding
ENSMUSG00000090693	tripartite motif-containing 43A [Source:MGI Symbol;Acc:MGI:3645218]	9	88580891	88588819	Trim43a	protein_coding
ENSMUSG00000054568	ubiquitin specific peptidase 17-like A [Source:MGI Symbol;Acc:MGI:107699]	7	104857009	104862667	Usp17la	protein_coding
ENSMUSG00000062369	ubiquitin specific peptidase 17-like B [Source:MGI Symbol;Acc:MGI:3051498]	7	104840257	104842603	Usp17lb	protein_coding
ENSMUSG00000091045	vomeronasal 2, receptor 55 [Source:MGI Symbol;Acc:MGI:3757950]	7	12651706	12684991	Vmn2r55	protein_coding
ENSMUSG00000037440	vanin 1 [Source:MGI Symbol;Acc:MGI:108395]	10	23894688	23905343	Vnn1	protein_coding
ENSMUSG00000012282	wingless-type MMTV integration site family, member 8A [Source:MGI Symbol;Acc:MGI:107924]	18	34542313	34548273	Wnt8a	protein_coding
ENSMUSG00000067813	X-linked Kx blood group related 9 [Source:MGI Symbol;Acc:MGI:2686466]	1	13668771	13701723	Xkr9	protein_coding
ENSMUSG00000110103	zinc finger and SCAN domain containing 4, pseudogene 1 [Source:MGI Symbol;Acc:MGI:3645953]	7	11065139	11069691	Zscan4-ps1	protein_coding (pseudogene)
ENSMUSG00000076749	T cell receptor gamma, constant 1 [Source:MGI Symbol;Acc:MGI:98625]	13	19214103	19217024	Tcrg-C1	TR_C_gene
ENSMUSG00000101462	predicted gene 3052 [Source:MGI Symbol;Acc:MGI:3781230]	1	34415050	34417986	Gm3052	transcribed_processed_pseudogene
ENSMUSG00000074196	chloride channel accessory 4C, pseudogene [Source:MGI Symbol;Acc:MGI:3643218]	3	144861826	144896011	Clca4c-ps	transcribed_unprocessed_pseudogene
ENSMUSG00000083190	cytochrome P450, family 4, subfamily a, member 30, pseudogene [Source:MGI Symbol;Acc:MGI:3649426]	4	115343788	115363115	Cyp4a30-ps	unprocessed_pseudogene
ENSMUSG00000075611	predicted gene 11545 [Source:MGI Symbol;Acc:MGI:2144683]	11	94756976	94757763	Gm11545	unprocessed_pseudogene
ENSMUSG00000095136	predicted gene 12616 [Source:MGI Symbol;Acc:MGI:3649883]	11	60679707	60680088	Gm12616	unprocessed_pseudogene
ENSMUSG00000085328	predicted gene 17131 [Source:MGI Symbol;Acc:MGI:4937958]	5	127878531	127882376	Gm17131	unprocessed_pseudogene
ENSMUSG00000090351	predicted gene 17204 [Source:MGI Symbol;Acc:MGI:4938031]	14	42582988	42585202	Gm17204	unprocessed_pseudogene
ENSMUSG00000103598	predicted gene 4856 [Source:MGI Symbol;Acc:MGI:3644725]	3	59505581	59535226	Gm4856	unprocessed_pseudogene
ENSMUSG00000038218	predicted gene 9765 [Source:MGI Symbol;Acc:MGI:3642721]	1	171515233	171516922	Gm9765	unprocessed_pseudogene
