# Supplementary material for: The HUSH complex cooperates with TRIM28 to repress young retrotransposons and new genes
Source: HighWire-hosted journal article supplement (doi:10.1101/gr.228171.117), 2018-05-04
Supplement: Supplemental_Figures_Legends.pdf [file Supplemental_Figures_Legends.pdf]

Figure S1

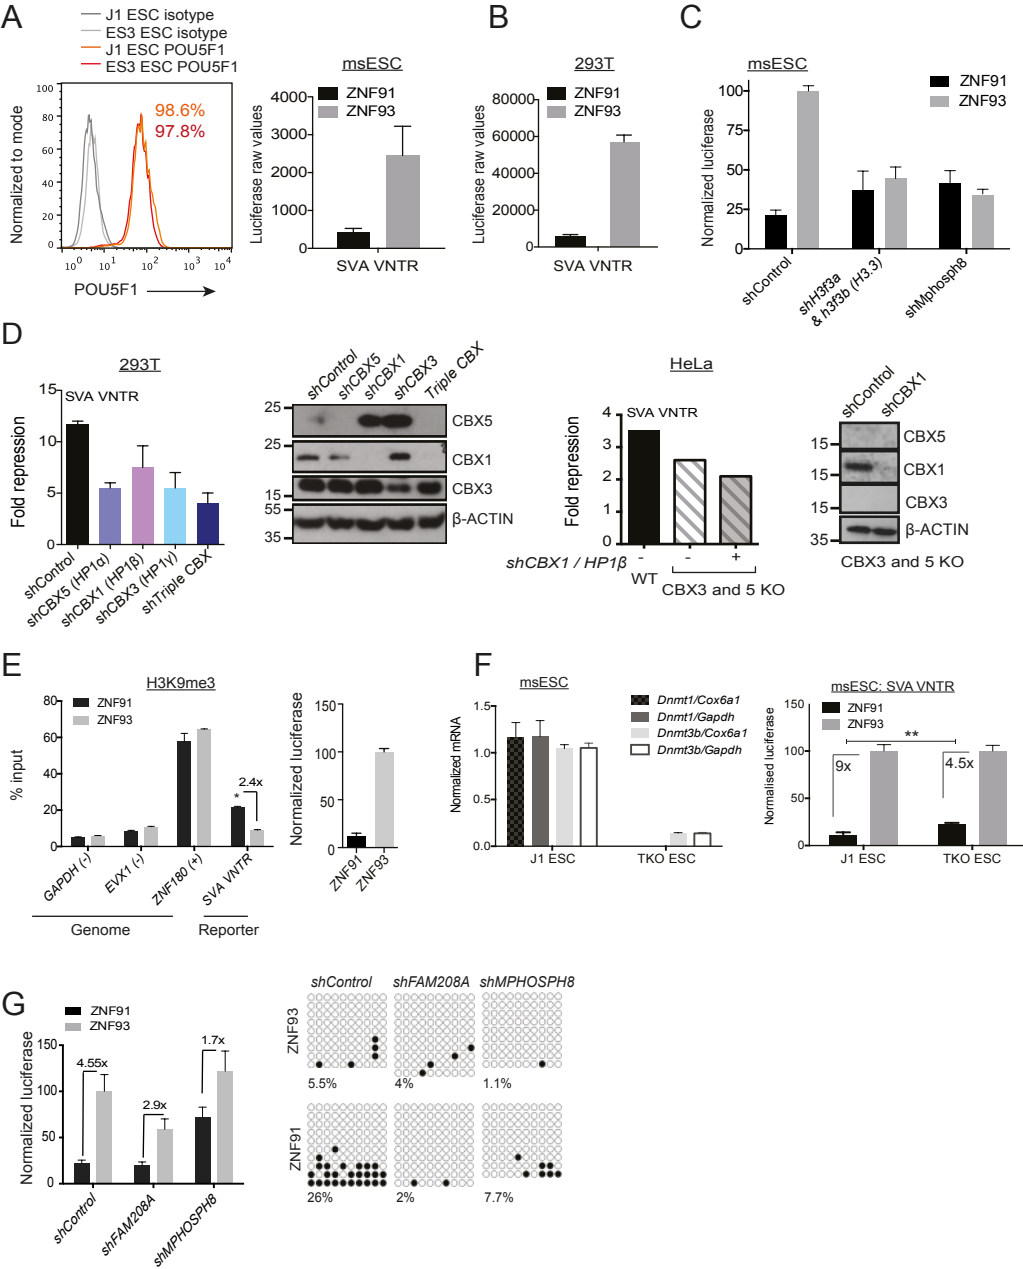

### Supplemental Fig S1.

(A) Two genetic strains of msESCs (J1 and ES3) were verified to express POU5F1 (left) and subject to reporter assays (right, ES3 shown). Raw luciferase values are given to show the reporter assay is robust in msESCs. (B) Despite the reporter containing a *POU5F1* enhancer, luciferase expression does not depend on POU5F1 as it is robust in POU5F1-negative 293T cells. (C) Reporter assays in ES3 msESCs depleted for H3F3A/B (H3.3) or MPHOSPH8. Results are normalized to the shControl + ZNF93. (D) Reporter assays were performed in 293T cells depleted for CBX family members (left) or HeLa cells double knockout (CRISPR/Cas9-mediated) for CBX5 and CBX3 (HP1alpha and gamma) expressing a hairpin for CBX1 (HP1beta) (right). The greatest relief of repression was upon triple CBX (HP1) depletion. Western blots show depletion efficiencies. (E) H3K9me3 ChIP on 293T cells 48h post-reporter transfection. Results show IPs normalized to TIs. H3K9me3 enrichment was measured at the reporter (SVA VNTR) and in the genome. Rabbit polyclonal IgG was used as a negative control (giving no enrichment, not shown). Genomic *GAPDH* and *EVX1* were internal negative control regions and *ZNF180* was a positive control. One representative experiment of two is shown and error bars show standard error (sem) of technical replicates. A two-tailed paired t test was performed on both experiments showing significant H3K9me3 accumulation on the reporter ( $p=0.029$ ). (F) Triple knockout (TKO) msESCs that are *Dnmt1*<sup>-/-</sup>, *Dnmt3a*<sup>-/-</sup> and *Dnmt3b*<sup>-/-</sup> (from Masaki Okano) were verified to be depleted of DNMT1 and DNMT3B by qRT-PCR using their parent cell line, J1 ESCs as a control (left panel). J1 ESCs and TKO cells were co-transfected in triplicate with reporter assays (right panel). Repression was significantly enhanced in control compared to TKO cells (unpaired t-test,  $p=0.0042$ ). (G) Relates to Figure 1G. Left: reporter assay results done in the same cells that were subject to DNA methylation analysis that is shown in Figure 1G. Results were all normalized to the shControl + ZNF93 bar.

Fold repression between ZNF91 and the control ZNF93 are given. Right: raw DNA methylation data from one representative experiment for which summary data are shown in Figure 1G.

Figure S2

A

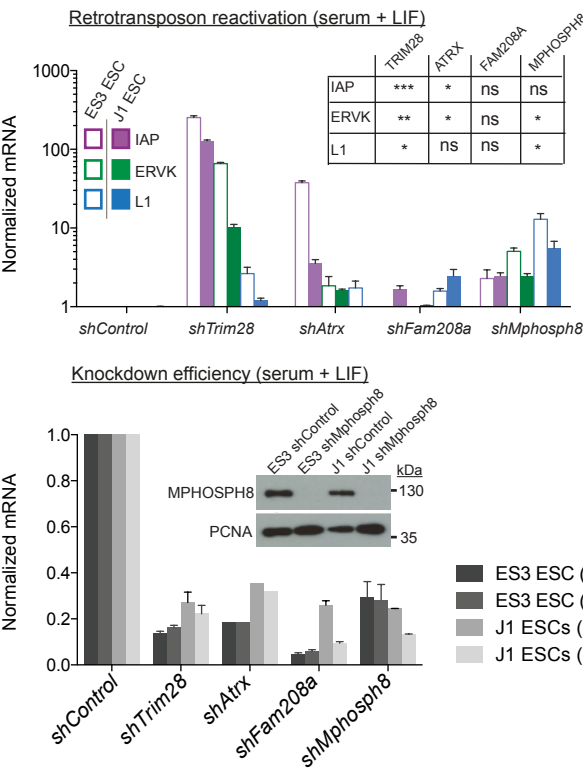

B

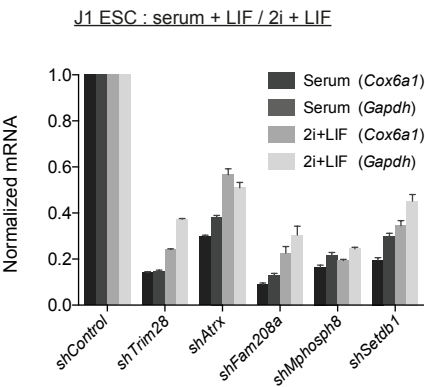

### Supplemental Fig S2.

(A) ES3 and J1 msESCs cultured in serum + LIF were depleted for epigenetic factors and expression of retrotransposons measured by qRT-PCR. Data shown are from one representative experiment of two, normalized to *Gapdh*. The table shows p values (two-tailed paired t tests) for this and repeat experiments (N=2 for ES3 ESCs and N=2 for J1 ESCs). Knockdown efficiency was verified by qRT-PCR and Western blot for MPHOSPH8 (bottom) and TRIM28 (not shown). Expected sizes, MPHOSPH8: 97kDa. (B) Depletion of epigenetic factors was verified by qRT-PCR for J1 ESCs cultured in serum + LIF vs. 2i + LIF, which relates to the experiment depicted in Figure 3C. Data were normalized to *Cox6a1* and *Gapdh*.

Figure S3

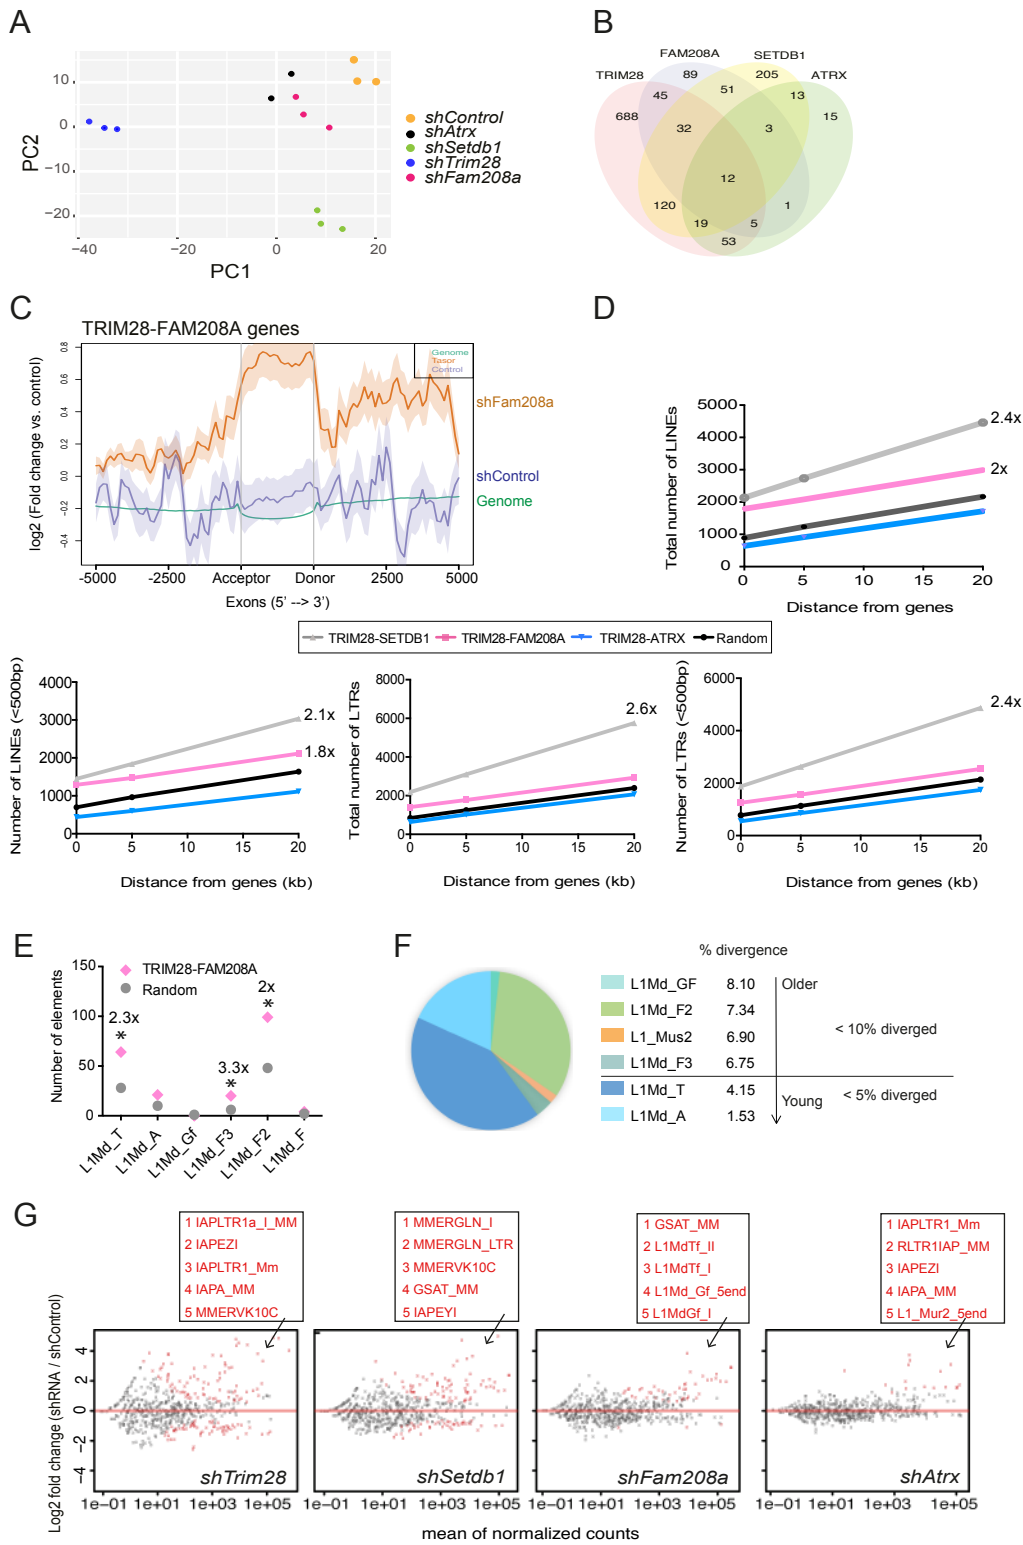

### Supplemental Fig S3.

(A) Principal component analysis (PCA) shows that treatment groups cluster together. Each group has 3 samples except ATRX, which has 2. (B) Venn diagram of all the upregulated genes between the different mRNA-seq treatment groups. (C) Ngs.plots that show coverage of reads across the exons of the 94 TRIM28-FAM208A genes (depicted between the two vertical lines) in the *shControl* vs. the *shFam208a* samples vs. the genome. The whole length of transcripts are upregulated, although coverage is not completely even because otherwise it would be flat. (D) The rest of the results from Figure 3F are shown here. Fold changes relative to random genes are stated where differences were observed. (E) In a complementary analysis to (D) where L1s were assessed by length, here we assessed them by type independent of length. We used the UCSC table browser to intersect gene groups with bed files of stated L1 families. TRIM28-FAM208A genes were significantly enriched for the TRIM28-regulated L1s, L1Md\_T, L1Md\_F3 and L1Md\_F2 within them compared to random genes. (F) The same identified L1 integrants in Figure 3H were re-classified here by age this time based on their mean divergence from consensus sequences. All integrants were less than 10% diverged. (G) MA plots showing differences in retrotransposon expression between each treatment group and the *shControl*. Repeats that exhibit a significant (where adjusted p values  $\leq 0.01$ ) up or downregulation are displayed in red. The top 5 upregulated repeat names are annotated in each top right corner box.

Figure S4

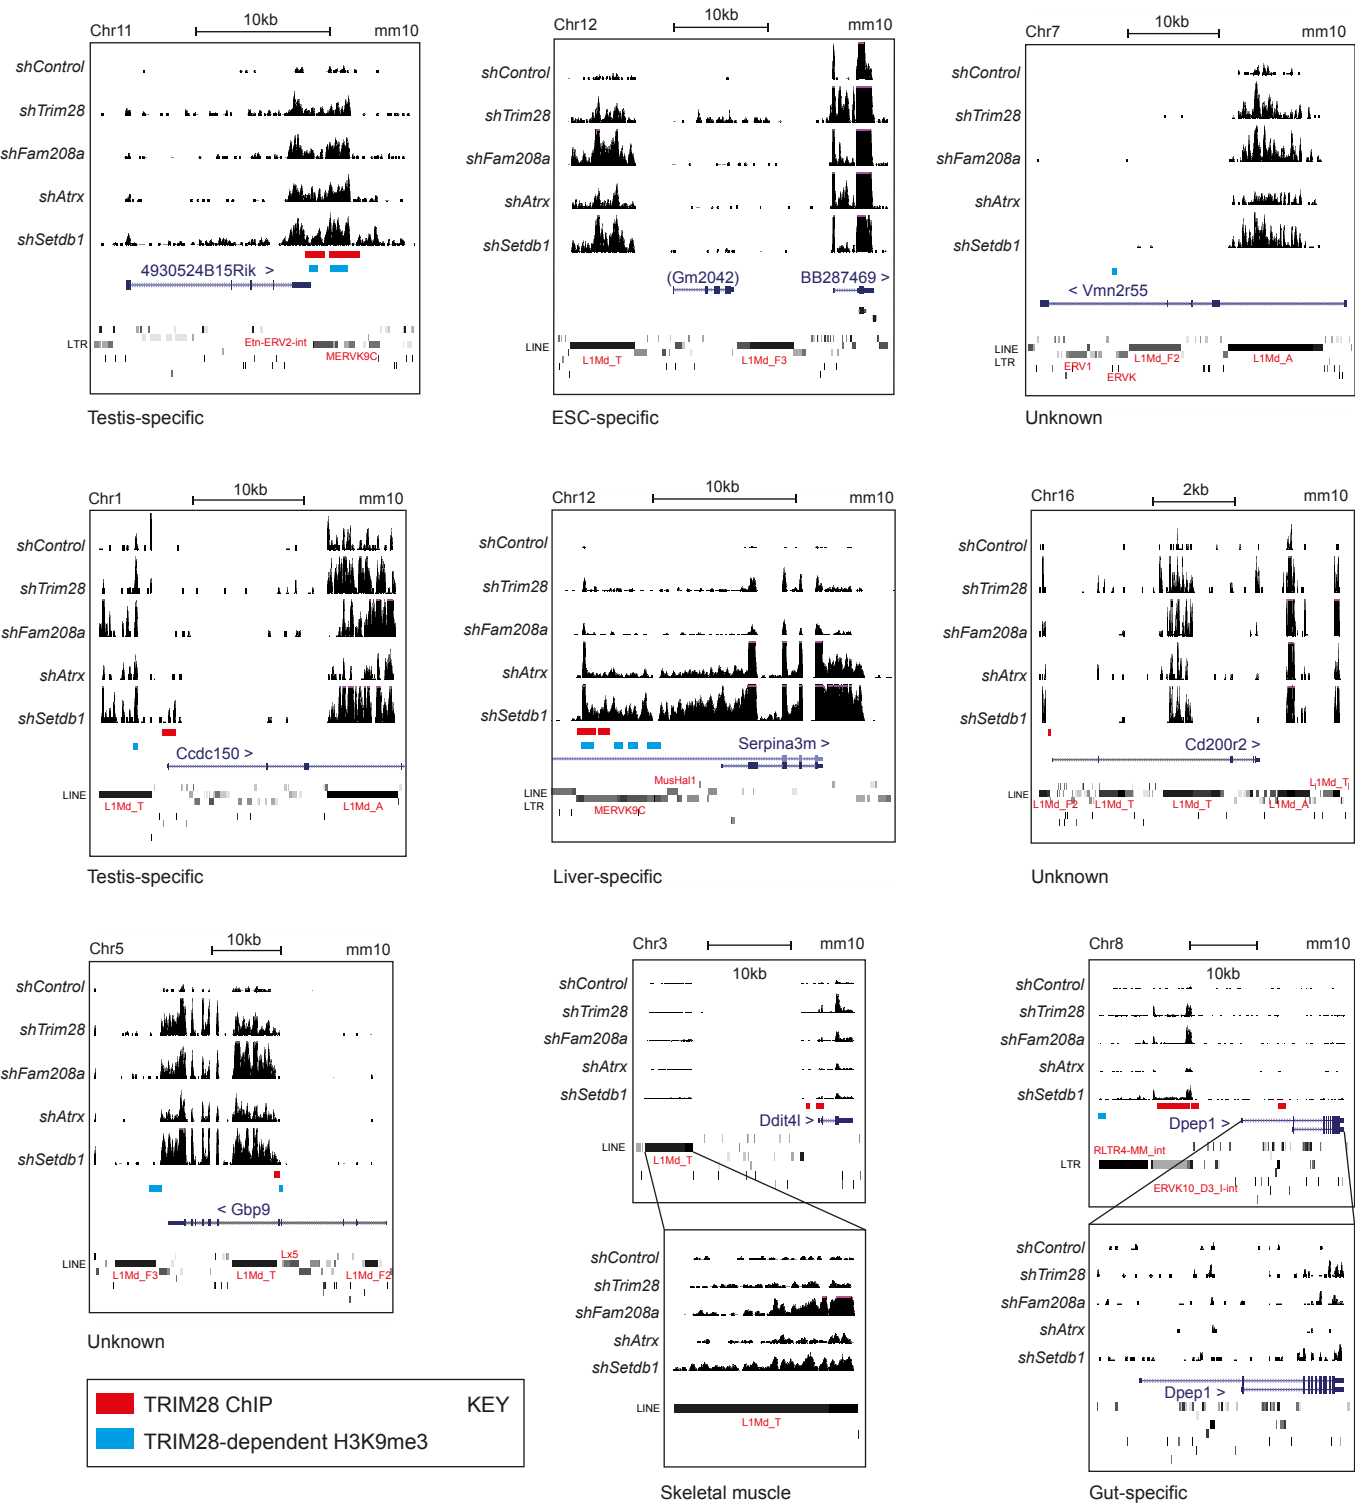



**Supplemental Fig S4.**

mRNA-sequencing tracks (see methods) of naive J1 msESC depleted of the stated epigenetic factors. TRIM28 binding (Castro-Diaz et al. 2014) and TRIM28-dependent H3K9me3 (Rowe et al. 2013b) are annotated. TRIM28-dependent H3K9me3 was previously defined as H3K9me3 peaks that are lost in TRIM28-depleted msESCs (Rowe et al. 2013b).

Figure S5

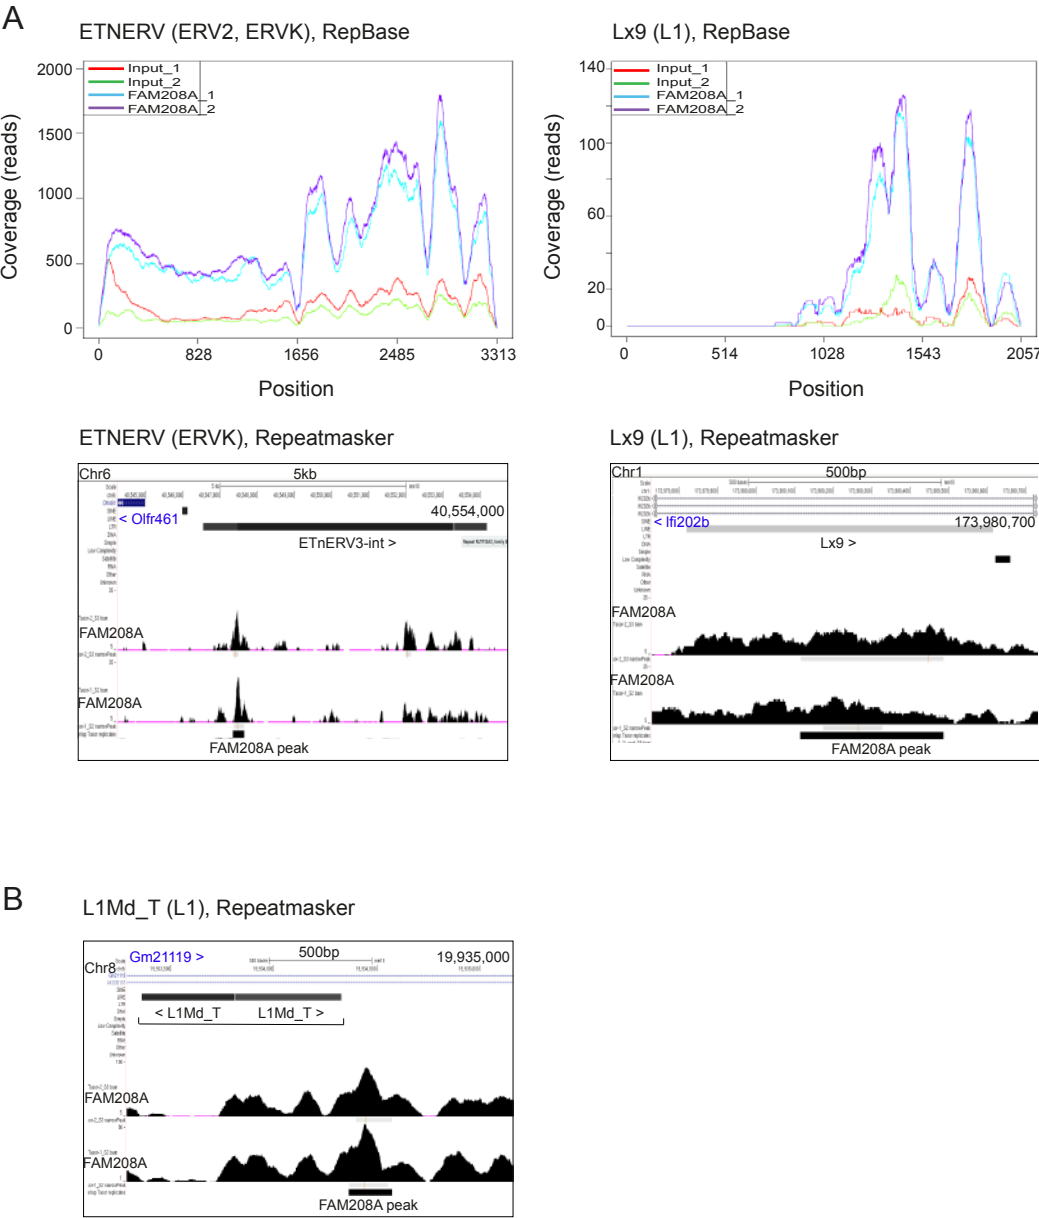

### **Supplemental Fig S5.**

(A) Example ERV and L1 bound by FAM208A. Upper panels show reads mapped directly to the stated RepBase consensus sequences. FAM208A IP samples are shown in blue and purple. Lower panels show UCSC screenshots of FAM208A binding at the same retrotransposon families but this time following mapping of reads to the genome. Tracks show bigWig files and the FAM208A peak identified underneath as determined by MACS2. (B) UCSC screenshot of FAM208A binding at a young L1Md\_T element in the genome. Note that we could not detect any specific binding of FAM208A to young L1 RepBase consensus sequences (including L1Md\_T) compared to total input samples (not shown).

Figure S6

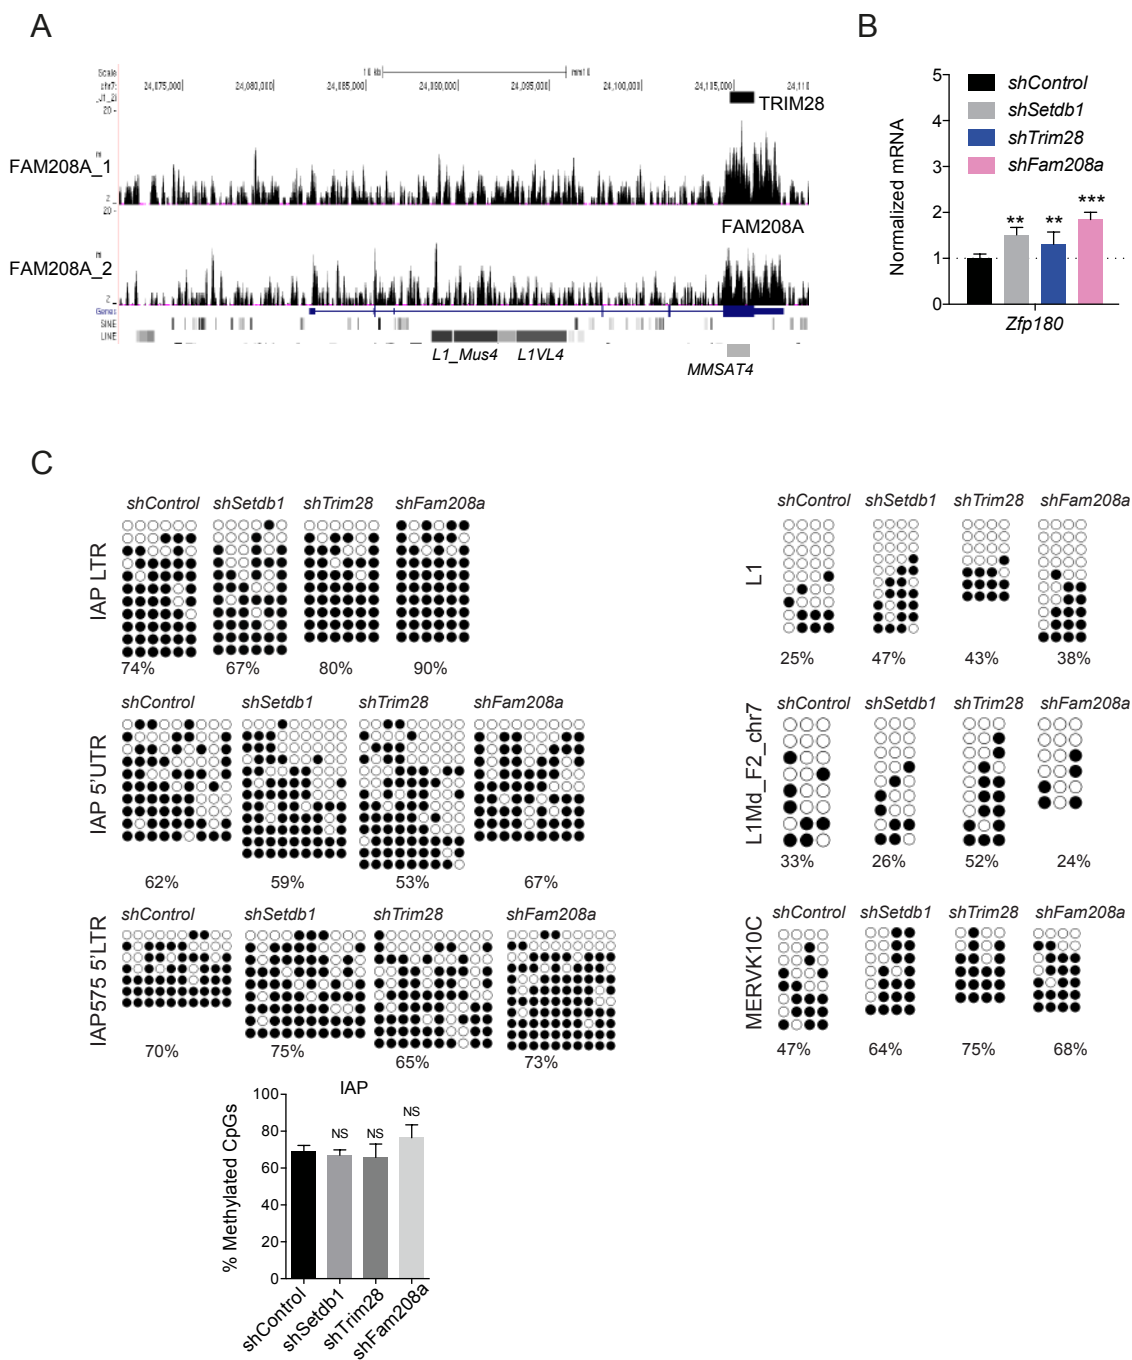

### Supplemental Fig S6.

(A) UCSC map of the mouse *Zfp180* locus showing TRIM28 and FAM208A co-binding. TRIM28 data are mapped peaks from (Castro-Diaz et al. 2014) and FAM208A data are bigWig files from this study. (B) qRT-PCR results showing *Zfp180* expression. A summary of 3 experiments is shown with two-tailed unpaired t-tests. (C) DNA methylation analysis at endogenous IAP, MERVK10C and L1 retrotransposons 4 days after depletion of epigenetic factors in J1 ESCs (2i+LIF cultured). Statistical results are representative of the three independent depicted measurements made on DNA methylation levels at IAP elements. Note that IAP LTR and L1 shControl data are also shown in Figure 6D.

Figure S7

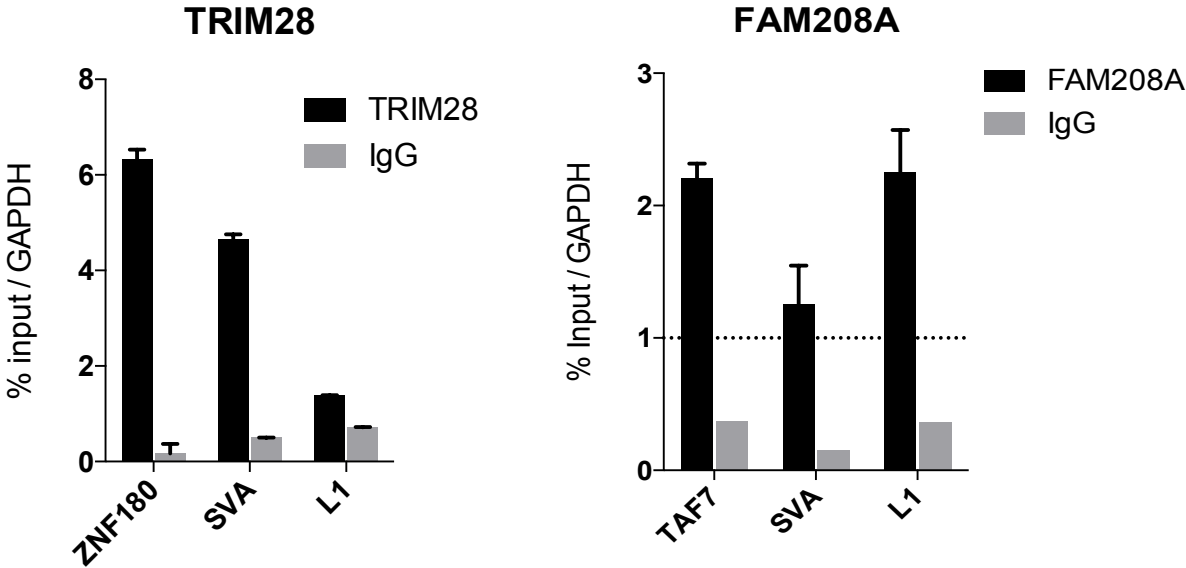

**Supplemental Fig S7.**

The same ChIP-PCR results from Figure 6J are illustrated here showing enrichment of TRIM28 (left) and FAM208A (right) on SVA and L1 elements but this time with the respective IgG controls shown. ZNF180 was a positive control for TRIM28 enrichment and TAF7 was a positive control for FAM208A enrichment.
